# Supplementary material for: Estimation of secondary household attack rates for emergent SARS-CoV-2 variants detected by genomic surveillance at a community-based testing site in San Francisco
Source: PubMed Central journal article supplement — medRxiv. 2021 Mar 3:2021.03.01.21252705. Preprint. [Version 1] doi: 10.1101/2021.03.01.21252705 (PMC7941666; doi:10.1101/2021.03.01.21252705), 2021-03-03
Supplement: NIHPP2021.03.01.21252705-supplement-1.pdf [file NIHPP2021.03.01.21252705-supplement-1.pdf]

## Supplemental Figure 1

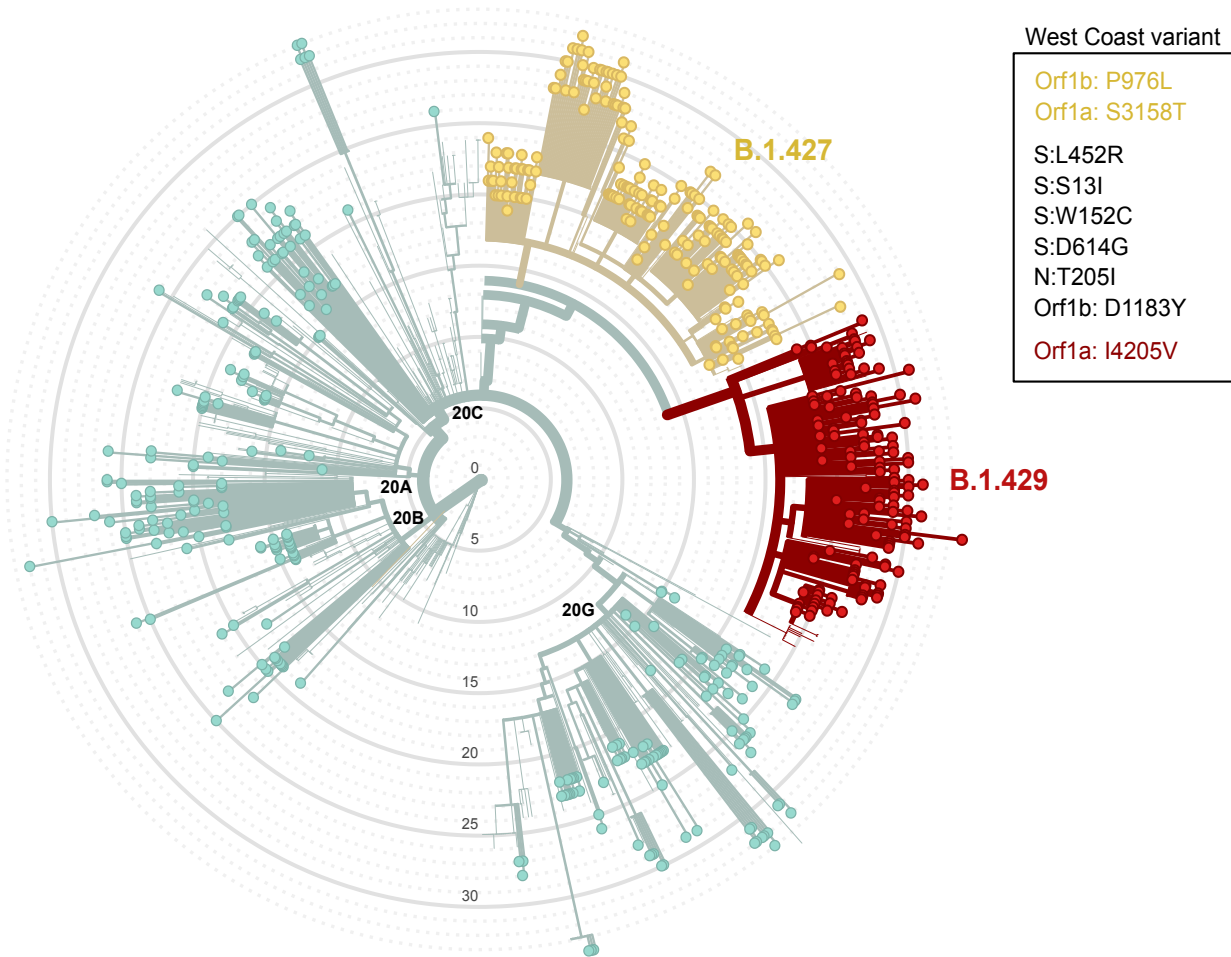

## Supplemental Figure 2

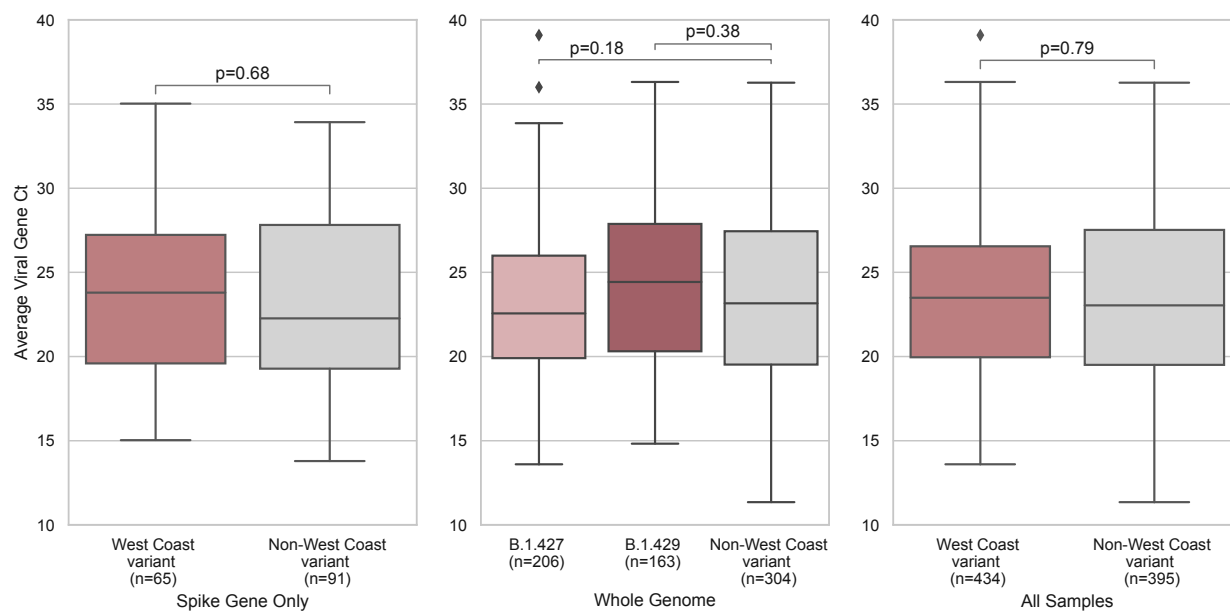

**Supplementary Table 1:** Characteristics of all persons (N=8,822; 10.0% with positive result) tested at the community-based testing site between January 10-29.

|                             | Negative (N=7937) | Positive (N=885) | Total (N=8822) |
|-----------------------------|-------------------|------------------|----------------|
| <b>Gender</b>               |                   |                  |                |
| Female                      | 3595 (90.2%)      | 391 (9.8%)       | 3986 (100%)    |
| Male                        | 4190 (89.7%)      | 481 (10.3%)      | 4671 (100%)    |
| Other                       | 152 (92.1%)       | 13 (7.9%)        | 165 (100%)     |
| <b>Age Group</b>            |                   |                  |                |
| Age ≤ 12                    | 488 (83.1%)       | 99 (16.9%)       | 587 (100%)     |
| Age 13-35                   | 3032 (88.8%)      | 382 (11.2%)      | 3414 (100%)    |
| Age 36-64                   | 3844 (91.5%)      | 355 (8.5%)       | 4199 (100%)    |
| Age ≥ 65                    | 573 (92.1%)       | 49 (7.9%)        | 622 (100%)     |
| <b>Race/Ethnicity</b>       |                   |                  |                |
| Hispanic/Latinx             | 5700 (88.5%)      | 744 (11.5%)      | 6444 (100%)    |
| Asian                       | 610 (93.7%)       | 41 (6.3%)        | 651 (100%)     |
| White/Caucasian             | 818 (96.3%)       | 31 (3.7%)        | 849 (100%)     |
| Black or African American   | 228 (96.6%)       | 8 (3.4%)         | 236 (100%)     |
| Other                       | 581 (90.5%)       | 61 (9.5%)        | 642 (100%)     |
| <b>Occupation*</b>          |                   |                  |                |
| Food & Beverage             | 987 (90.5%)       | 104 (9.5%)       | 1091 (100%)    |
| Tradesperson                | 423 (87%)         | 63 (13%)         | 486 (100%)     |
| Day laborer                 | 227 (89.4%)       | 27 (10.6%)       | 254 (100%)     |
| Healthcare                  | 277 (93.9%)       | 18 (6.1%)        | 295 (100%)     |
| Student                     | 780 (84.4%)       | 144 (15.6%)      | 924 (100%)     |
| Other                       | 2557 (92.4%)      | 211 (7.6%)       | 2768 (100%)    |
| No employment               | 1126 (88.8%)      | 142 (11.2%)      | 1268 (100%)    |
| <b>Day of Test Symptoms</b> |                   |                  |                |
| Asymptomatic                | 6089 (94.6%)      | 347 (5.4%)       | 6436 (100%)    |
| Symptomatic                 | 1848 (77.5%)      | 538 (22.5%)      | 2386 (100%)    |

\* Occupation information missing from 1,736 persons.

**Supplementary Table 2: Sample sequencing summary and viral cycle threshold characteristics.**

|                                              |         | <b>Spike Gene Only</b> | <b>Whole Genome</b> | <b>Total Count (Jan 10-Jan 30)</b> |
|----------------------------------------------|---------|------------------------|---------------------|------------------------------------|
| <b>Total Samples Run</b>                     |         | 165                    | 674                 | 839                                |
| <b>Total High Quality (&gt;92% coverage)</b> |         | 96                     | 620                 | 716                                |
| <b>Average Reads/Sample</b>                  |         | 96,237                 | 2,437,080           | -                                  |
| <b>Average % Gene/Genome Covered</b>         |         | 83.35                  | 97.09               | 94.39                              |
| <b>Mean Viral Ct</b>                         |         | 23.78                  | 23.63               | 23.65                              |
| Mean Viral Ct<br>West Coast variant          | B.1.427 | 24.00                  | 23.60               | 23.62                              |
|                                              | B.1.429 |                        |                     |                                    |
| Mean Viral Ct<br>Non-West Coast variant      |         | 23.63                  | 23.76               | 23.67                              |
| <b>Median Viral Ct</b>                       |         | 23.65                  | 23.26               | 23.26                              |
| Median Viral Ct<br>West Coast variant        | B.1.427 | 24.00                  | 23.42               | 23.49                              |
|                                              | B.1.429 |                        |                     |                                    |
| Median Viral Ct<br>Non-West Coast variant    |         | 22.83                  | 23.16               | 23.04                              |
| <b>Viral Ct Interquartile Range (IQR)</b>    |         | 8.29                   | 7.16                | 7.42                               |
| Viral Ct IQR<br>West Coast variant           | B.1.427 | 7.39                   | 6.40                | 6.59                               |
|                                              | B.1.429 |                        |                     |                                    |
| Viral Ct IQR Non-West Coast variant          |         | 8.88                   | 7.93                | 8.01                               |

**Supplementary Table 3: Amino acid substitutions observed in the spike gene and count of sequences per mutation in each study.**

| Spike domain            | Position in S gene         | Mutation       | Count Nov. 23- Dec. 1 2020 (n=191) | Count Jan. 10- Jan.29 2021 (n=716) | Total count (n=907) |         |         |
|-------------------------|----------------------------|----------------|------------------------------------|------------------------------------|---------------------|---------|---------|
|                         | 5                          | L5F            | 4                                  | 4                                  | 8                   |         |         |
|                         | 8                          | L8W            | 0                                  | 3                                  | 3                   |         |         |
|                         | 9                          | P9L            | 0                                  | 3                                  | 3                   |         |         |
| N-terminal domain       | 13                         | S13I           | 30                                 | 381                                | 411                 |         |         |
|                         | 18                         | L18F           | 0                                  | 2                                  | 2                   |         |         |
|                         | 19                         | T19I           | 0                                  | 3                                  | 3                   |         |         |
|                         | 21                         | R21T           | 0                                  | 2                                  | 2                   |         |         |
|                         | 22                         | T22I           | 0                                  | 9                                  | 9                   |         |         |
|                         | 26                         | P26S           | 9                                  | 46                                 | 55                  |         |         |
|                         | 26                         | P26L           | 2                                  | 0                                  | 2                   |         |         |
|                         | 27                         | A27V           | 0                                  | 1                                  | 1                   |         |         |
|                         | 49                         | H49Y           | 0                                  | 4                                  | 4                   |         |         |
|                         | 67                         | A67V           | 2                                  | 15                                 | 17                  |         |         |
|                         | 69                         | H69Q           | 1                                  | 6                                  | 7                   |         |         |
|                         | 70                         | V70F           | 3                                  | 0                                  | 3                   |         |         |
|                         | 76                         | T76I           | 0                                  | 1                                  | 1                   |         |         |
|                         | 78                         | R78K           | 0                                  | 1                                  | 1                   |         |         |
|                         | 95                         | T95I           | 7                                  | 4                                  | 11                  |         |         |
|                         | 111                        | D111N          | 0                                  | 2                                  | 2                   |         |         |
|                         | 138                        | D138Y          | 1                                  | 2                                  | 3                   |         |         |
|                         | 141                        | L141F          | 0                                  | 1                                  | 1                   |         |         |
|                         | 142                        | G142-          | 0                                  | 1                                  | 1                   |         |         |
|                         | 143                        | V143F          | 0                                  | 1                                  | 1                   |         |         |
|                         | 143                        | V143-          | 0                                  | 1                                  | 1                   |         |         |
|                         | 152                        | W152C          | 30                                 | 354                                | 384                 |         |         |
|                         | 153                        | M153I          | 1                                  | 2                                  | 3                   |         |         |
|                         | 155                        | S155N          | 0                                  | 4                                  | 4                   |         |         |
|                         | 173                        | Q173K          | 0                                  | 1                                  | 1                   |         |         |
|                         | 178                        | D178G          | 4                                  | 2                                  | 6                   |         |         |
|                         | 185                        | N185T          | 0                                  | 1                                  | 1                   |         |         |
|                         | 215                        | D215Y          | 7                                  | 1                                  | 8                   |         |         |
|                         | 222                        | A222V          | 0                                  | 1                                  | 1                   |         |         |
|                         | 251                        | P251S          | 1                                  | 1                                  | 2                   |         |         |
|                         | 252                        | G252V          | 0                                  | 2                                  | 2                   |         |         |
|                         | 254                        | S254F          | 1                                  | 0                                  | 1                   |         |         |
|                         | 257                        | G257S          | 0                                  | 3                                  | 3                   |         |         |
| 258                     | W258L                      | 0              | 14                                 | 14                                 |                     |         |         |
| 261                     | G261V                      | 0              | 1                                  | 1                                  |                     |         |         |
| Receptor binding domain | 357                        | R357K          | 0                                  | 7                                  | 7                   |         |         |
|                         | 367                        | V367I          | 7                                  | 3                                  | 10                  |         |         |
|                         | 372                        | A372V          | 0                                  | 1                                  | 1                   |         |         |
|                         | 449                        | Y449-          | 0                                  | 1                                  | 1                   |         |         |
|                         | 452                        | L452R          | 30                                 | 381                                | 411                 |         |         |
|                         | 475                        | A475S          | 0                                  | 1                                  | 1                   |         |         |
|                         | 478                        | T478K          | 0                                  | 26                                 | 26                  |         |         |
|                         | 484                        | E484K          | 0                                  | 1                                  | 1                   |         |         |
|                         | 485                        | G485V          | 0                                  | 1                                  | 1                   |         |         |
|                         | 494                        | S494P          | 0                                  | 6                                  | 6                   |         |         |
|                         | 520                        | A520S          | 1                                  | 1                                  | 2                   |         |         |
| 574                     | D574Y                      | 3              | 0                                  | 3                                  |                     |         |         |
| Spike domain            | 583                        | E583D          | 5                                  | 11                                 | 16                  | B.1.243 |         |
|                         | 613                        | Q613H          | 7                                  | 4                                  | 11                  | Q677P   |         |
|                         | 614                        | D614G          | 191                                | 716                                | 907                 | Q677P   |         |
|                         | 622                        | V622I          | 0                                  | 1                                  | 1                   | P681H   |         |
|                         | 657                        | N657D          | 1                                  | 0                                  | 1                   | B.1.427 |         |
|                         | Adjacent to S1/S2 junction | 675            | Q675H                              | 2                                  | 5                   | 7       | B.1.429 |
|                         |                            | 677            | Q677P                              | 0                                  | 10                  | 10      | P.2     |
|                         |                            | 677            | Q677H                              | 11                                 | 10                  | 21      |         |
|                         |                            | 679            | N679K                              | 0                                  | 1                   | 1       |         |
|                         |                            | 681            | P681H                              | 0                                  | 29                  | 29      |         |
|                         |                            | 681            | P681R                              | 1                                  | 0                   | 1       |         |
|                         |                            | 688            | A688V                              | 5                                  | 8                   | 13      |         |
|                         |                            | 701            | A701S                              | 0                                  | 1                   | 1       |         |
|                         |                            | 716            | T716I                              | 0                                  | 1                   | 1       |         |
|                         |                            | 719            | T719I                              | 0                                  | 3                   | 3       |         |
|                         |                            | 732            | T732A                              | 7                                  | 52                  | 59      |         |
|                         |                            | 769            | G769V                              | 3                                  | 4                   | 7       |         |
|                         |                            | 771            | A771D                              | 0                                  | 2                   | 2       |         |
|                         |                            | 779            | Q779H                              | 0                                  | 2                   | 2       |         |
|                         |                            | 780            | E780Q                              | 0                                  | 1                   | 1       |         |
|                         |                            | 792            | P792L                              | 0                                  | 1                   | 1       |         |
|                         |                            | 812            | P812S                              | 0                                  | 1                   | 1       |         |
|                         |                            | 813            | S813G                              | 0                                  | 2                   | 2       |         |
|                         |                            | Fusion peptide | 818                                | I818V                              | 0                   | 1       | 1       |
|                         |                            | 845            | A845S                              | 0                                  | 3                   | 3       |         |
|                         |                            | 846            | A846V                              | 0                                  | 1                   | 1       |         |
|                         |                            | 879            | A879S                              | 2                                  | 0                   | 2       |         |
|                         |                            | 936            | D936H                              | 3                                  | 1                   | 4       |         |
|                         | Heptad repeat 1            | 936            | D936Y                              | 1                                  | 0                   | 1       |         |
|                         |                            | 938            | L938F                              | 2                                  | 25                  | 27      |         |
|                         |                            | 954            | Q954K                              | 0                                  | 2                   | 2       |         |
|                         |                            | 1026           | A1026S                             | 1                                  | 0                   | 1       |         |
|                         |                            | 1063           | L1063F                             | 0                                  | 1                   | 1       |         |
| 1072                    |                            | E1072K         | 0                                  | 10                                 | 10                  |         |         |
| 1078                    |                            | A1078S         | 0                                  | 3                                  | 3                   |         |         |
| 1078                    |                            | A1078V         | 0                                  | 1                                  | 1                   |         |         |
| 1103                    |                            | F1103L         | 1                                  | 0                                  | 1                   |         |         |
| 1121                    |                            | F1121V         | 1                                  | 0                                  | 1                   |         |         |
| 1163                    |                            | D1163V         | 0                                  | 2                                  | 2                   |         |         |
| Heptad repeat 2         | 1168                       | D1168G         | 1                                  | 0                                  | 1                   |         |         |
|                         | 1171                       | G1171S         | 0                                  | 2                                  | 2                   |         |         |
|                         | 1176                       | V1176F         | 0                                  | 1                                  | 1                   |         |         |
|                         | 1191                       | K1191N         | 9                                  | 4                                  | 13                  |         |         |
|                         | 1195                       | E1195Q         | 0                                  | 1                                  | 1                   |         |         |
|                         | 1201                       | Q1201K         | 0                                  | 2                                  | 2                   |         |         |
| Trans-membrane domain   | 1228                       | V1228L         | 0                                  | 1                                  | 1                   |         |         |
|                         | 1235                       | C1235F         | 5                                  | 4                                  | 9                   |         |         |
|                         | 1244                       | L1244F         | 1                                  | 0                                  | 1                   |         |         |
|                         | 1252                       | S1252P         | 1                                  | 0                                  | 1                   |         |         |
|                         | 1252                       | S1252F         | 0                                  | 1                                  | 1                   |         |         |

Co-variant group key

- B.1.243
- Q677P
- Q677P
- P681H
- B.1.427
- B.1.429
- P.2

**Supplementary Table 4:** Individual characteristics of all persons tested (both positive and negative, and including index case) living in one of the 318 households meeting inclusion criteria for household secondary attack rate analyses, stratified by strain classification of the household.

|                           | Non-West coast<br>(N=571) | West coast         |                    |                           | Total<br>(N=1184) |
|---------------------------|---------------------------|--------------------|--------------------|---------------------------|-------------------|
|                           |                           | B.1.427<br>(N=284) | B.1.429<br>(N=246) | All West coast<br>(N=613) |                   |
| <b>Sex</b>                |                           |                    |                    |                           |                   |
| Female                    | 275 (48.2%)               | 123 (43.3%)        | 120 (48.8%)        | 286 (46.7%)               | 561 (47.4%)       |
| Male                      | 288 (50.4%)               | 156 (54.9%)        | 124 (50.4%)        | 320 (52.2%)               | 608 (51.4%)       |
| Other                     | 8 (1.4%)                  | 5 (1.8%)           | 2 (0.8%)           | 7 (1.1%)                  | 15 (1.3%)         |
| <b>Age Group</b>          |                           |                    |                    |                           |                   |
| Age <= 12                 | 78 (13.7%)                | 24 (8.5%)          | 42 (17.1%)         | 79 (12.9%)                | 157 (13.3%)       |
| Age 13-35                 | 253 (44.3%)               | 117 (41.2%)        | 105 (42.7%)        | 257 (41.9%)               | 510 (43.1%)       |
| Age 36-64                 | 216 (37.8%)               | 126 (44.4%)        | 90 (36.6%)         | 245 (40.0%)               | 461 (38.9%)       |
| Age >= 65                 | 24 (4.2%)                 | 17 (6.0%)          | 9 (3.7%)           | 32 (5.2%)                 | 56 (4.7%)         |
| <b>Race/Ethnicity</b>     |                           |                    |                    |                           |                   |
| Hispanic/Latinx           | 511 (89.5%)               | 233 (82.0%)        | 217 (88.2%)        | 518 (84.5%)               | 1029<br>(86.9%)   |
| Asian                     | 17 (3.0%)                 | 10 (3.5%)          | 12 (4.9%)          | 28 (4.6%)                 | 45 (3.8%)         |
| White/Caucasian           | 16 (2.8%)                 | 13 (4.6%)          | 3 (1.2%)           | 18 (2.9%)                 | 34 (2.9%)         |
| Black or African American | 4 (0.7%)                  | 7 (2.5%)           | 1 (0.4%)           | 12 (2.0%)                 | 16 (1.4%)         |
| Other                     | 23 (4.0%)                 | 21 (7.4%)          | 13 (5.3%)          | 37 (6.0%)                 | 60 (5.1%)         |
| <b>Occupation*</b>        |                           |                    |                    |                           |                   |
| Food & Beverage           | 68 (11.9%)                | 48 (16.9%)         | 23 (9.3%)          | 80 (13.1%)                | 148 (12.5%)       |
| Tradesperson              | 35 (6.1%)                 | 16 (5.6%)          | 4 (1.6%)           | 24 (3.9%)                 | 59 (5.0%)         |
| Day laborer               | 19 (3.3%)                 | 8 (2.8%)           | 9 (3.7%)           | 18 (2.9%)                 | 37 (3.1%)         |
| Healthcare                | 13 (2.3%)                 | 7 (2.5%)           | 2 (0.8%)           | 11 (1.8%)                 | 24 (2.0%)         |
| Student                   | 110 (19.3%)               | 34 (12.0%)         | 62 (25.2%)         | 110 (17.9%)               | 220 (18.6%)       |
| Other                     | 133 (23.3%)               | 70 (24.6%)         | 62 (25.2%)         | 148 (24.1%)               | 281 (23.7%)       |
| No employment             | 86 (15.1%)                | 55 (19.4%)         | 43 (17.5%)         | 115 (18.8%)               | 201 (17.0%)       |

| <b>Day of Test Symptoms</b> |             |             |             |             |             |
|-----------------------------|-------------|-------------|-------------|-------------|-------------|
| Asymptomatic                | 320 (56.0%) | 166 (58.5%) | 131 (53.3%) | 348 (56.8%) | 668 (56.4%) |
| Symptomatic                 | 251 (44.0%) | 118 (41.5%) | 115 (46.7%) | 265 (43.2%) | 516 (43.6%) |

\* Occupation information missing for 214 persons.

**Supplementary Table 5:** Adjusted attack rates from sensitivity analysis using Targeted Maximum Likelihood and Super Learning.

|                       | <b>Adjusted</b>     |                |
|-----------------------|---------------------|----------------|
|                       | <b>aRR (95% CI)</b> | <b>p-value</b> |
| <b>Class</b>          |                     |                |
| <b>Non-West Coast</b> | -                   | -              |
| <b>West Coast</b>     | 1.17 (0.93-1.49)    | 0.188          |
| <b>Lineage</b>        |                     |                |
| <b>B.1.427</b>        | 1.17 (0.87-1.56)    | 0.294          |
| <b>B.1.429</b>        | 1.34 (1.01-1.78)    | 0.045          |



## SUPPLEMENTARY METHODS

### *SARS-CoV-2 genomic sequence recovery*

Swab samples from individuals testing positive by BinaxNOW were placed in DNA/RNA shield and processed as previously described [1]. Extracted total nucleic acid was diluted based on average SARS-CoV-2 N and E gene cycle threshold (Ct) values; samples with a Ct range 12-15 were diluted 1:100, 15-18 1:10 and >18 no dilution. For high throughput scaling, library preparation reaction volumes and dilutions were miniaturized utilizing acoustic liquid handling. Library preparation followed either the modified versions of the Primal-Seq Nextera XT version 2.0 protocol [2,3], or the modified version of SARS-CoV-2 Tailed Amplicon Illumina Sequencing V.2 [4], both using the ARTIC Network V3 primers [5]. A subset of initial samples were library prepared using the Tailed Amplicon Sequencing V.2 with only primer pairs 71-84 of the ARTIC V3 primers to tile all of the S gene. Final libraries were sequenced by paired-end 2 x 150bp sequencing on an Illumina NovaSeq platform, or for the S-gene-only set, 2 x 300bp on an Illumina MiSeq.

### *SARS-CoV-2 consensus genome generation*

Raw .fastq files were imported into IDseq and consensus genomes were generated automatically using the embedded SARS-CoV-2 pipeline [6]. Specifically, minimap2 was used to align raw reads to the reference genome MN908947.2 [7], then the consensus sequence was generated using samtools [8], mpileup and ivar [9]. The IDseq consensus genome pipeline is implemented in WDL [10]. Viral genomes with at least 92% (27,500nt) recovery were uploaded to GISAID [11], a worldwide repository for SARS-CoV-2 genomes and Genbank [12].

Phylogenetic analysis was conducted and results were visualized in Nextclade (<https://clades.nextstrain.org>) [13].

### *Bayesian Phylogenetic Analysis*

To compare the viral diversity of the two variants of interest, B.1.427 and B.1.429, we identified two other SARS-CoV-2 lineages, B.1.232 and B.1.243 that were prevalent in the state of California from July 2020 onwards. Both of these lineages contained more sequences on GISAID from California than any other location, based on the PANGO lineage assignment [14] on GISAID. For each of the 4 lineages spreading in California, we randomly subsampled all available genomes from GISAID and this study to 500 or fewer genomes. For subsampled genomes, we aligned them against the reference genome (Genbank accession: MN996528.1) using MAFFT v7.471 [15] with default settings. Each multi-sequence alignment was used to build a separate maximum likelihood tree in IQ-TREE v.1.6.12 [16] with default options. The trees were rooted at the reference genome. The maximum likelihood tree was used to visually identify outlier sequences which could have been misclassified as that PANGO lineage. The resulting number of genomes included in the downstream analysis were: B.1.232: 368; B.1.243: 500; B.1.427: 495; B.1.429: 443. The multi-sequence alignment of the coding region for each lineage was analyzed in BEAST v.1.10.4 [17] with unlinked molecular clocks between the S gene and other genes, uncorrelated relaxed molecular clock (lognormal distribution), GTR substitution model with 4 rate categories (selected by the BIC value in ModelTest [18]), and the Bayesian Skygrid population model [19]. Default prior values and operator values were used. The MCMC chains were 100M in length, sampled every 50,000, and the first 50% of samples

discarded as burnin. We ran 2 replicate MCMC chains for each analysis, and used all samples to summarize the results.

We fit an exponential model to the median SkyGrid estimate between 2020-07-01 and 2021-01-01 to calculate the growth rate per day  $r$ , and calculated the reproductive number  $R$  using the formula [20]  $R = (1+r/b)^a$ , where  $a=1.39$  is the shape parameter and  $b=0.14$  is the scale parameter of a gamma generation time distribution with a mean of 5 days a standard deviation of 1.9 days [21]. The 95% confidence interval (95% CI) around  $R$  was calculated based on the 95% CI around the  $r$  estimate. Samples used for the Bayesian Analysis are detailed in the supplementary file.

## REFERENCES

1. Crawford ED, Acosta I, Ahyong V, et al. Rapid deployment of SARS-CoV-2 testing: The CLIAHUB. *PLOS Pathog* **2020**; 16:e1008966.
2. Quick J, Grubaugh ND, Pullan ST, et al. Multiplex PCR method for MinION and Illumina sequencing of Zika and other virus genomes directly from clinical samples. *Nat Protoc* **2017**; 12:1261–1276.
3. R&d DP. COVID-19 ARTIC v3 Illumina library construction and sequencing protocol. **2020**; Available at: <https://www.protocols.io/view/covid-19-artic-v3-illumina-library-construction-an-bibt kann>. Accessed 23 February 2021.
4. Gohl DM, Garbe J, Grady P, et al. A rapid, cost-effective tailed amplicon method for sequencing SARS-CoV-2. *BMC Genomics* **2020**; 21:863.
5. [artic-network/artic-ncov2019](https://github.com/artic-network/artic-ncov2019). Available at: <https://github.com/artic-network/artic-ncov2019>. Accessed 25 February 2021.

6. Kalantar KL, Carvalho T, de Bourcy CFA, et al. IDseq-An open source cloud-based pipeline and analysis service for metagenomic pathogen detection and monitoring. *GigaScience* **2020**; 9.
7. Li H. Minimap2: pairwise alignment for nucleotide sequences. *Bioinforma Oxf Engl* **2018**; 34:3094–3100.
8. Li H, Handsaker B, Wysoker A, et al. The Sequence Alignment/Map format and SAMtools. *Bioinforma Oxf Engl* **2009**; 25:2078–2079.
9. Grubaugh ND, Gangavarapu K, Quick J, et al. An amplicon-based sequencing framework for accurately measuring intrahost virus diversity using PrimalSeq and iVar. *Genome Biol* **2019**; 20:8.
10. chanzuckerberg/idseq-workflows. Chan Zuckerberg Initiative, 2021. Available at: <https://github.com/chanzuckerberg/idseq-workflows>. Accessed 25 February 2021.
11. Elbe S, Buckland-Merrett G. Data, disease and diplomacy: GISAID’s innovative contribution to global health. *Glob Chall Hoboken NJ* **2017**; 1:33–46.
12. Clark K, Karsch-Mizrachi I, Lipman DJ, Ostell J, Sayers EW. GenBank. *Nucleic Acids Res* **2016**; 44:D67-72.
13. Hadfield J, Megill C, Bell SM, et al. Nextstrain: real-time tracking of pathogen evolution. *Bioinforma Oxf Engl* **2018**; 34:4121–4123.
14. Rambaut A, Holmes EC, O’Toole Á, et al. A dynamic nomenclature proposal for SARS-CoV-2 lineages to assist genomic epidemiology. *Nat Microbiol* **2020**; 5:1403–1407.
15. Katoh K, Standley DM. MAFFT multiple sequence alignment software version 7: improvements in performance and usability. *Mol Biol Evol* **2013**; 30:772–780.

16. Nguyen L-T, Schmidt HA, von Haeseler A, Minh BQ. IQ-TREE: a fast and effective stochastic algorithm for estimating maximum-likelihood phylogenies. *Mol Biol Evol* **2015**; 32:268–274.
17. Suchard MA, Lemey P, Baele G, Ayres DL, Drummond AJ, Rambaut A. Bayesian phylogenetic and phylodynamic data integration using BEAST 1.10. *Virus Evol* **2018**; 4:vey016.
18. Posada D, Crandall KA. MODELTEST: testing the model of DNA substitution. *Bioinforma Oxf Engl* **1998**; 14:817–818.
19. Gill MS, Lemey P, Faria NR, Rambaut A, Shapiro B, Suchard MA. Improving Bayesian population dynamics inference: a coalescent-based model for multiple loci. *Mol Biol Evol* **2013**; 30:713–724.
20. Fraser C, Donnelly CA, Cauchemez S, et al. Pandemic potential of a strain of influenza A (H1N1): early findings. *Science* **2009**; 324:1557–1561.
21. Ferretti L, Wymant C, Kendall M, et al. Quantifying SARS-CoV-2 transmission suggests epidemic control with digital contact tracing. *Science* **2020**; 368.
